# Supplementary material for: Essential Oil from Pinus Koraiensis Pinecones Inhibits Gastric Cancer Cells via the HIPPO/YAP Signaling Pathway
Source: PubMed Central journal article supplement (PMC6864528; doi:10.3390/molecules24213851), 2019-10-25

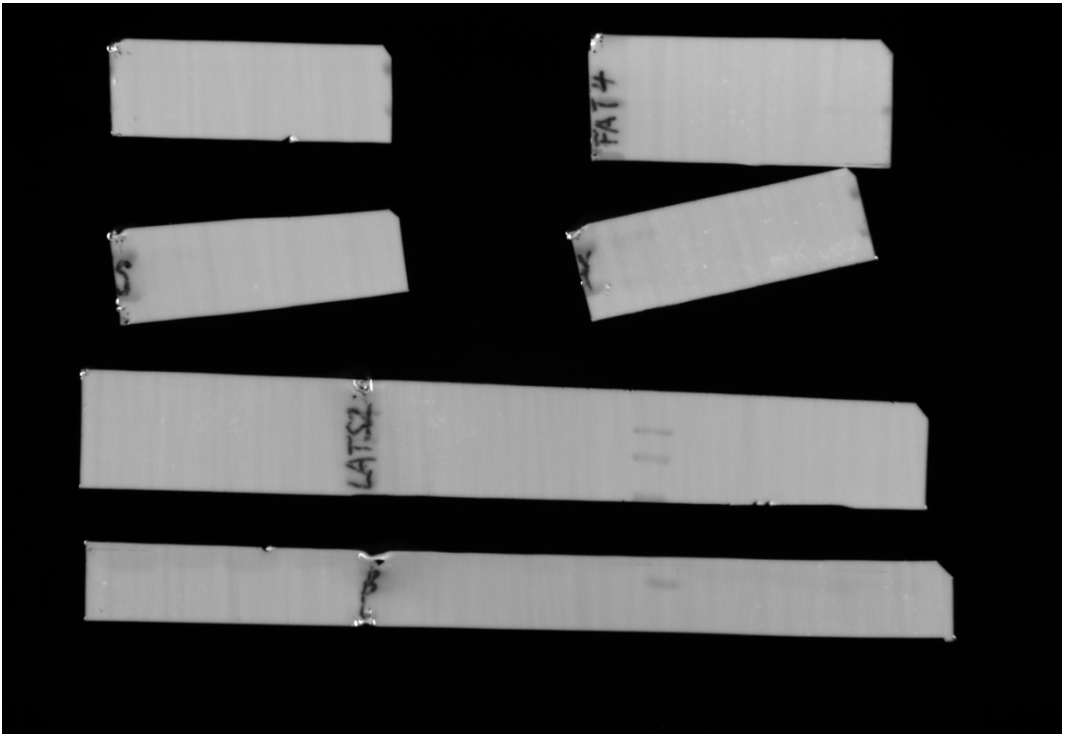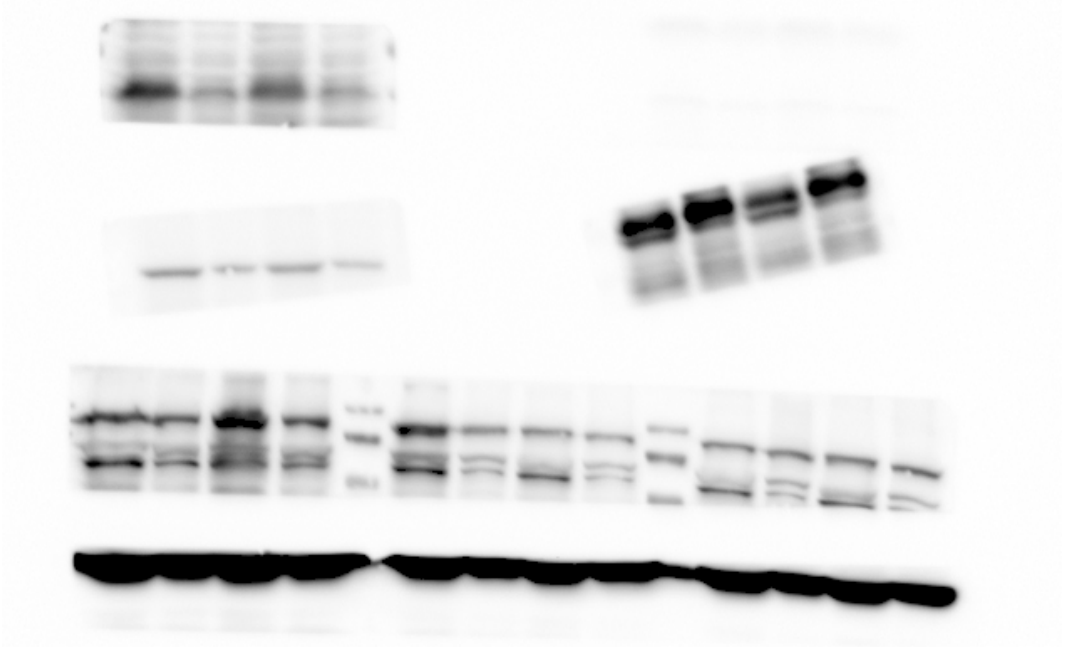

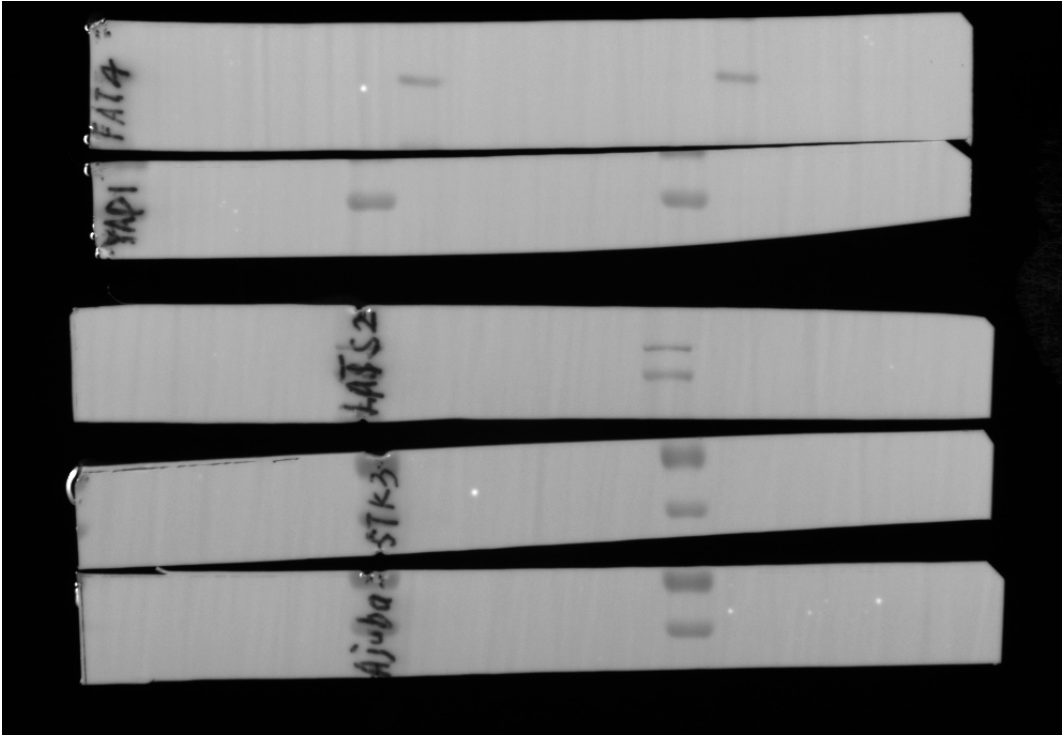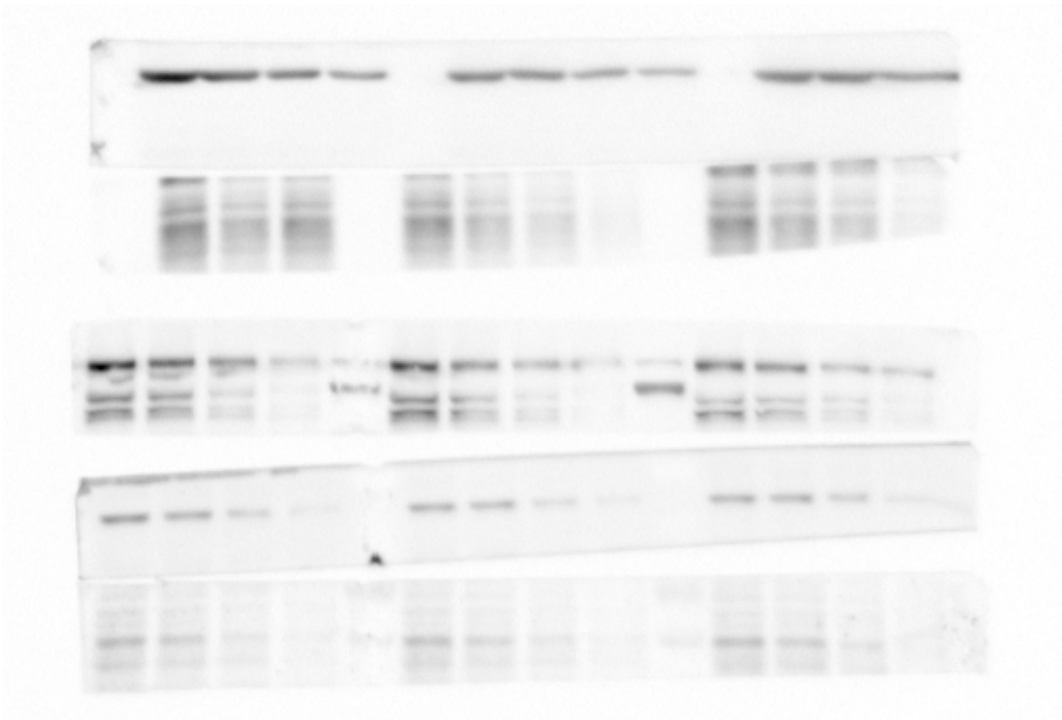

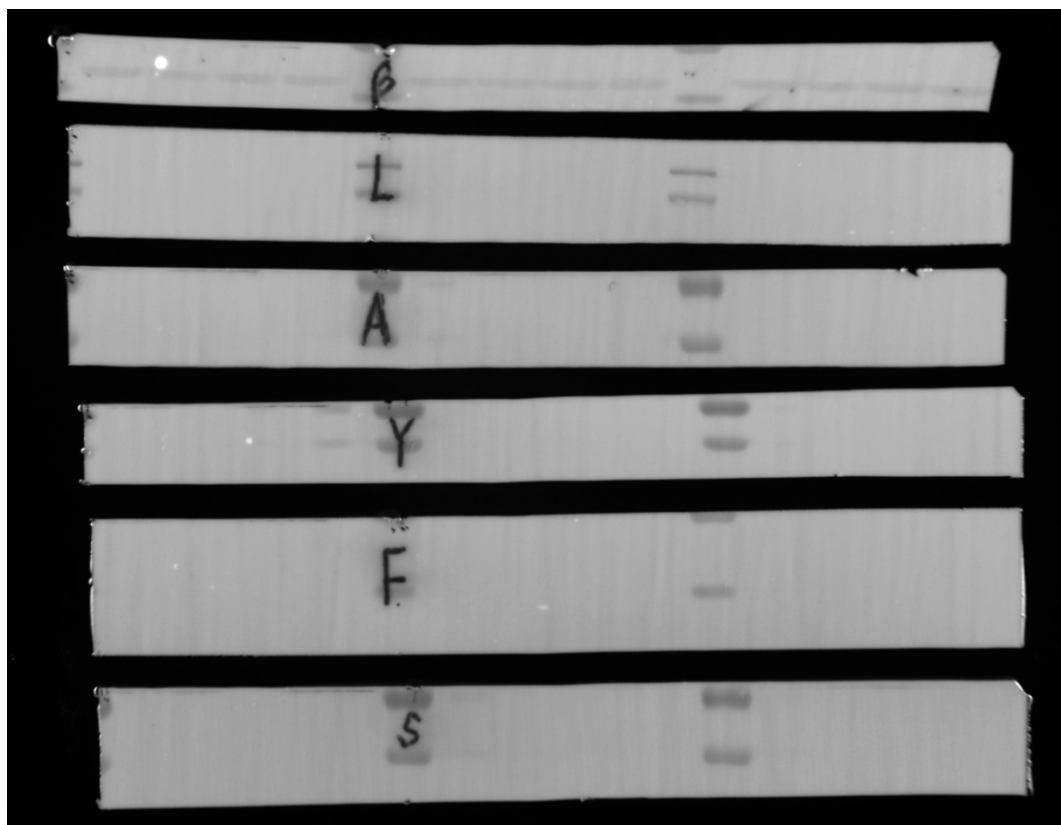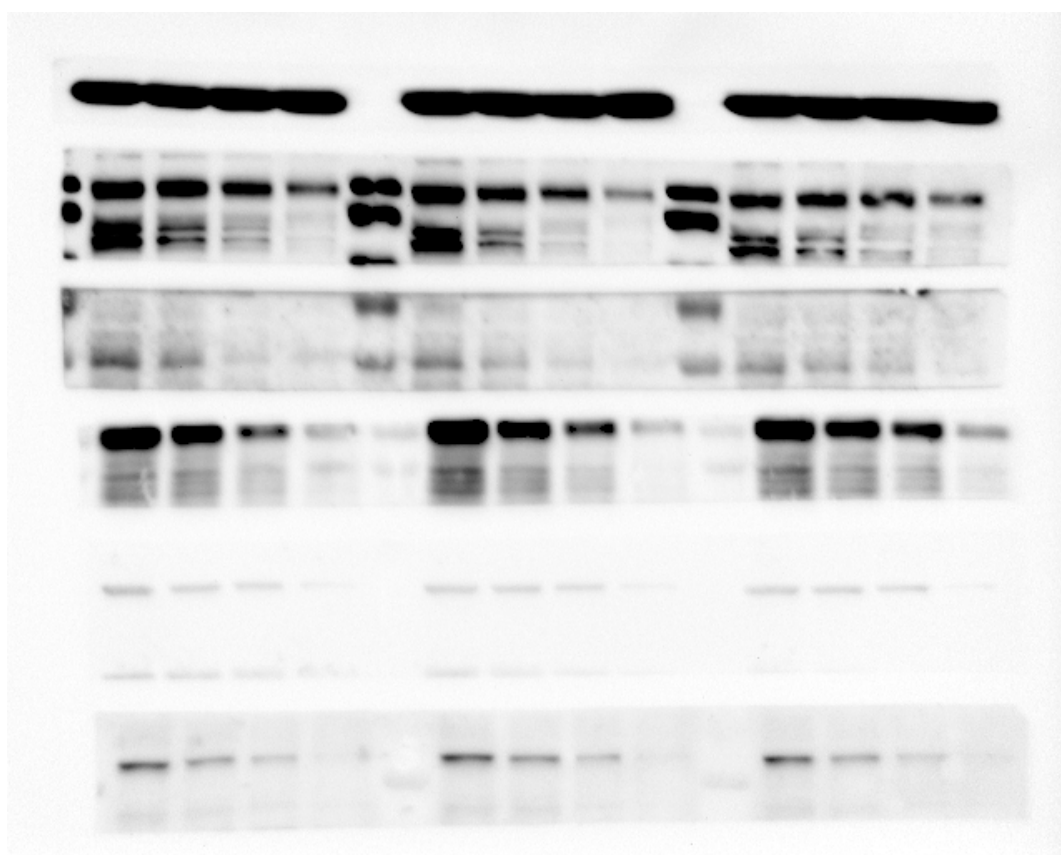

Supplement: molecules-24-03851-s001.pdf [file molecules-24-03851-s001.pdf]
